# Supplementary material
Source: Springer Nature journal article supplement (https://www.springermedizin.de/resource/supplementary/12889_2010_3071_MOESM3_ESM.pdf/9487980)
Supplement: MOESM3 [file 9487980]

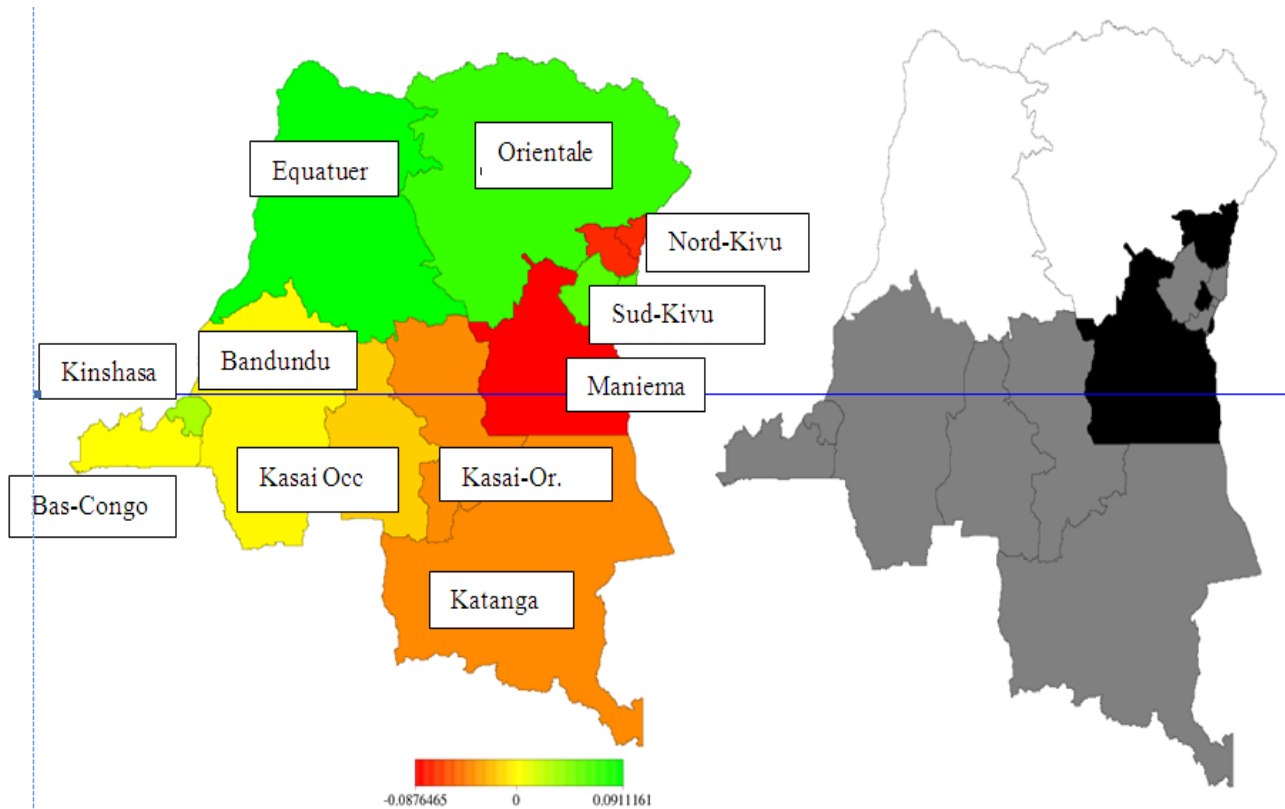

Red coloured – high risk  
 Green coloured – low risk

Black coloured – significant positive spatial effect  
 White coloured- significant negative spatial effect  
 Grey coloured – no significant effect
